## Sheathless guiding catheter versus “slender” sheath/guiding catheter combination in acute coronary syndrome: a propensity-matched analysis of two downsized devices

T. Isawa, K. Horie, T. Honda

Sendai Kousei Hospital, Sendai, Japan

**Funding Acknowledgement:** Type of funding source: None

**Purpose:** We investigated the differences between a sheathless guiding catheter and a Glidesheath slender/guiding catheter combination regarding access-site complications in percutaneous coronary intervention (PCI) for acute coronary syndrome (ACS).

**Methods:** We enrolled consecutive 1108 patients undergoing transradial primary PCI for ACS at our hospital using either a 7.5-Fr sheathless guiding catheter (Sheathless group) or a 7-Fr Glidesheath slender/7-Fr guiding catheter combination (Glidesheath group); 1:1 propensity score matching was performed, and 718 subjects (359 in each group) were included in the propensity-matched sample.

**Results:** Compared with the Sheathless group, the Glidesheath group had significantly less frequent ultrasound-diagnosed radial artery occlusion at 30 days (Sheathless: 4.7% vs. Glidesheath: 1.4%,  $p=0.015$ ). No significant differences were observed in severe radial spasm (Sheathless: 1.4% vs. Glidesheath: 2.0%,  $p=0.77$ ) or access-site bleeding (Sheathless: 9.8% vs. Glidesheath: 8.6%,  $p=0.70$ ).

**Conclusion:** Thus, 7-Fr Glidesheath slender/7-Fr guiding catheter combination is clearly more advantageous than 7.5-Fr sheathless guiding catheters for decreased risk of radial artery occlusion in transradial PCI for ACS.

Procedural outcomes and complications

| Variables                  | Total population   |                     |                  |        | Propensity-matched population |                     |                   |        |
|----------------------------|--------------------|---------------------|------------------|--------|-------------------------------|---------------------|-------------------|--------|
|                            | Sheathless (n=711) | Glidesheath (n=397) | OR (95% CI)      | p      | Sheathless (n=359)            | Glidesheath (n=359) | OR (95% CI)       | p      |
| RAO at 30 days             | 25 (3.5)           | 6 (1.5)             | 2.37 (0.96–5.84) | 0.058  | 17 (4.7)                      | 5 (1.4)             | 3.52 (1.28–9.64)  | 0.015* |
| Severe radial spasm        | 11 (1.6)           | 9 (2.3)             | 0.68 (0.28–1.66) | 0.48   | 5 (1.4)                       | 7 (2.0)             | 0.71 (0.22–2.27)  | 0.77   |
| Access-site bleeding       |                    |                     |                  |        |                               |                     |                   |        |
| BARC type 2 or 3           | 72 (10.1)          | 32 (8.1)            | 1.29 (0.83–1.99) | 0.28   | 35 (9.8)                      | 31 (8.6)            | 1.14 (0.69–1.90)  | 0.70   |
| BARC type 3                | 9 (1.3)            | 5 (1.3)             | 1.01 (0.33–3.02) | 1.0    | 4 (1.1)                       | 4 (1.1)             | 1.69 (0.40–7.18)  | 0.72   |
| Coronary ostial dissection | 10 (1.4)           | 3 (0.8)             | 1.87 (0.51–6.85) | 0.40   | 6 (1.7)                       | 2 (0.6)             | 3.03 (0.61–15.13) | 0.29   |
| Procedural success         | 702 (98.7)         | 392 (98.7)          | 0.99 (0.33–2.99) | 1.0    | 354 (98.6)                    | 354 (98.6)          | 1.00 (0.29–3.48)  | 1.0    |
| MACCEs within 30 days      | 10 (1.4)           | 14 (3.5)            | 0.39 (0.17–0.89) | 0.029* | 7 (2.0)                       | 12 (3.3)            | 0.58 (0.22–1.48)  | 0.12   |

Data are presented as median (interquartile range) or n (%), unless otherwise indicated. “Sheathless” denotes the 7.5-Fr sheathless guiding catheter group, and “Glidesheath” denotes the 7-Fr Glidesheath slender/7-Fr guiding catheter combination group. The asterisk denotes a statistically significant difference between the two groups. BARC, Bleeding Academic Research Consortium; CI, confidence interval; MACCEs, major adverse cardiac and cerebrovascular events; N/A, not applicable; OR, odds ratio; RAO, radial artery occlusion. MACCEs include all-cause death, myocardial infarction, stent thrombosis, target-lesion revascularization, and stroke.

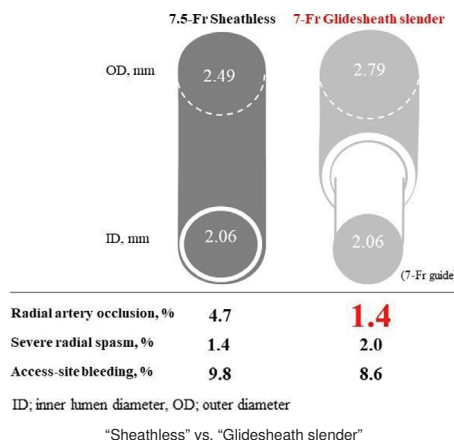

Source: http://academic.oup.com/eurheartj/article-pdf/41/Supplement_2/ehaa946.1739/34517626/ehaa946.1739.pdf
